# Supplementary material for: Relapse Rate in Survivors of Acute Autoimmune Thrombotic Thrombocytopenic Purpura Treated with or without Rituximab
Source: PubMed Central journal article supplement — Thromb Haemost. 2018 Sep 20;118(10):1743–51. doi: 10.1055/s-0038-1668545 (PMC6202932; doi:10.1055/s-0038-1668545), 2018-09-20
Supplement: 10-1055-s-0038-1668545-s180135.pdf [file 10-1055-s-0038-1668545-s180135.pdf]

**Supplementary Table S1** Severity score of each acute iTTP episode by number of the acute bout

| Number of the acute episode | Severity of the acute episode |          |              |            |            | Total number of patients with respective number of acute episodes |
|-----------------------------|-------------------------------|----------|--------------|------------|------------|-------------------------------------------------------------------|
|                             | 0 = laboratory abnormalities  | 1 = mild | 2 = moderate | 3 = severe | 4 = lethal |                                                                   |
| 1st                         | 1                             | 11       | 22           | 34         | 0          | 68                                                                |
| 2nd                         | 2                             | 19       | 8            | 7          | 1          | 37                                                                |
| 3rd                         | 2                             | 13       | 5            | 3          | 0          | 23                                                                |
| 4th                         | 5                             | 11       | 1            | 3          | 0          | 20                                                                |
| 5th                         | 3                             | 6        | 2            | 2          | 0          | 13                                                                |
| 6th                         | 3                             | 5        | 0            | 2          | 0          | 10                                                                |
| 7th                         | 1                             | 7        | 0            | 2          | 0          | 10                                                                |
| 8th                         | 1                             | 5        | 2            | 0          | 0          | 8                                                                 |
| 9th                         | 1                             | 5        | 0            | 0          | 0          | 6                                                                 |
| 10th                        | 0                             | 2        | 1            | 1          | 0          | 4                                                                 |
| 11th                        | 0                             | 2        | 0            | 0          | 0          | 2                                                                 |
| 12th                        | 0                             | 1        | 0            | 1          | 0          | 2                                                                 |
| 13th                        | 0                             | 1        | 0            | 0          | 1          | 2                                                                 |
| 14th                        | 0                             | 1        | 0            | 0          | 0          | 1                                                                 |
| 15th                        | 0                             | 1        | 0            | 0          | 0          | 1                                                                 |
| 16th                        | 0                             | 1        | 0            | 0          | 0          | 1                                                                 |
| 17th                        | 0                             | 1        | 0            | 0          | 0          | 1                                                                 |
| 18th                        | 0                             | 1        | 0            | 0          | 0          | 1                                                                 |
| 19th                        | 1                             | 0        | 0            | 0          | 0          | 1                                                                 |
| 20th                        | 1                             | 0        | 0            | 0          | 0          | 1                                                                 |
| 21st                        | 0                             | 1        | 0            | 0          | 0          | 1                                                                 |
| Total                       | 21                            | 94       | 41           | 55         | 2          | 213                                                               |

Abbreviation: iTTP, autoimmune thrombotic thrombocytopenic purpura.

Note: In total, data on clinical symptoms are available in 213 acute iTTP episodes. One patient had up to 21 acute iTTP bouts, another one up to 13. This is shown in the total number of patients for each number of acute episodes.

**Supplementary Table S2** Correlation between use of rituximab and severity of acute iTTP episodes

| Severity of acute iTTP episodes   | Treatment with rituximab |     | Total |
|-----------------------------------|--------------------------|-----|-------|
|                                   | No                       | Yes |       |
| 0 = laboratory abnormalities only | 12                       | 9   | 21    |
| 1 = mild                          | 69                       | 24  | 93    |
| 2 = moderate                      | 32                       | 9   | 41    |
| 3 = severe                        | 31                       | 23  | 54    |
| 4 = lethal                        | 1                        | 1   | 2     |
| Total                             | 145                      | 66  | 211   |

Abbreviation: iTTP, autoimmune thrombotic thrombocytopenic purpura.

Note: Frequency of the different clinical severity scores in correlation to treatment with or without rituximab in 211 acute episodes in 70 iTTP patients. Detailed data for therapy were obtainable in 219 and for severity in 213 of 224 acute episodes in 70 iTTP patients. No severity and therapy data were accessible in 3 iTTP patients in 4 acute bouts. In summary, detailed data for clinical severity as well as therapy in the same acute bout were available for 211 of 224 acute episodes in 70 iTTP patients.
